# Supplementary material for: Conflict-Sensitive Climate Change Adaptation: A Review
Source: MDPI journal article supplement (doi:10.3390/su14138060), 2022-07-01
Supplement: s1 [file s1]

Table S1: Summary of the Reviewed Papers

| <b>Climatic stress</b> | <b>Location</b>  | <b>Theme</b>                                            | <b>Underlying condition</b>                                                                                                      | <b>Impact (security and conflict)</b>                                                          | <b>Adaptation measures</b>                                                                                                                          | <b>Reference</b> |
|------------------------|------------------|---------------------------------------------------------|----------------------------------------------------------------------------------------------------------------------------------|------------------------------------------------------------------------------------------------|-----------------------------------------------------------------------------------------------------------------------------------------------------|------------------|
| Climate Change         | Global (review)  | Theorising conflict-sensitive adaptation                | A maladaptation could produce human insecurity. For example, geo-engineering, cross-border water sharing, REDD+, migration, etc. | They directly cause human threat and could potentially turn to violent conflict                | Coordination, networking and cooperation and use “do no harm” principle in action                                                                   | [11, 20, 42]     |
| Extreme heat and dry   | Chad, Africa     | Resource distribution in an existing conflicting area   | Prevail conflict over limited resources, marginalisation, poor human capital, over-exploitation                                  | shortened rainfall intensified aggression and conflict                                         | Livelihood diversification, reducing dependence on natural resources                                                                                | [12]             |
| Extreme heat and dry   | Botswana, Africa | Herding                                                 | Extreme marginality in pastoral society                                                                                          | Fly epidemic, livestock diseases, people–wildlife conflict                                     | Government revises land use policy which restricts pastorals from herding                                                                           | [16]             |
| Reduction of Rainfall  | Mali, Africa     | Livelihood vulnerabilities                              | Poverty and higher dependence on natural resources                                                                               | Struggle over limited resources, unemployment, migration                                       | Lack of coordination and information flow across different levels. Local participation and consideration of local specificities are grossly missing | [17]             |
| Extreme Heat and Dry   | Sudan, Africa    | Agriculture                                             | Unfertile soil, lack of finance and machinery, shortage of labour, inefficient policy support                                    | Crop loss, migration, unemployment                                                             | Early planting, frequent weeding, diversification of crops, cultivation of early maturing varieties and soil conservation                           | [18]             |
| Climate change         | Global (South)   | Global distribution of responsibility to Climate Change | Social cost, population growth, rapid urbanisation, ethno-political exclusion, poor national economies                           | Inequity in vulnerability and responsibility constrains many countries’ adaptation initiatives | The allocation of international adaptation fund to the global south should be approved on a sectoral basis                                          | [19]             |

|                                      |                  |                                                |                                                                                                  |                                                                                                                                      |                                                                                                                                                                                                                                                             |      |
|--------------------------------------|------------------|------------------------------------------------|--------------------------------------------------------------------------------------------------|--------------------------------------------------------------------------------------------------------------------------------------|-------------------------------------------------------------------------------------------------------------------------------------------------------------------------------------------------------------------------------------------------------------|------|
| Extreme heat and dry                 | Pakistan, Asia   | Agriculture                                    | High levels of poverty, poor infrastructure, and weak local government                           | Crop loss, death of livestock, water scarcity                                                                                        | Crop diversification, adjustment of cropping season                                                                                                                                                                                                         | [23] |
| Rainfall variability                 | Sri Lanka        | Farmer-wildlife conflict                       | Farmer–elephant conflict was pre-existing. However, the frequency has increased in recent years. | Increased elephant farmer encounters during droughts                                                                                 | Farmers have adjusted their crop cycle with rainfall. Farmers have awareness on climate change, but do not receive any state level support on agricultural adaptation measures                                                                              | [24] |
| Increasing temperature, low rainfall | Zimbabwe, Africa | Local fisher                                   | High unemployment, poverty, structured inequality, low human capital                             | Constrained livelihoods, sharing in limited resource, gender inequality, declining fishing resources, over-exploitation of resources | Livelihoods diversification, facilitation of access to fishing permits and other fishing-related assets                                                                                                                                                     | [25] |
| Global Warming                       | South China Sea  | Marine resources distribution                  | Lack of transboundary collaboration and legal framework                                          | Coastal inhabitants, ecosystem and economy will be impacted                                                                          | Development of transboundary network of marine protection area, institutional and legal reform                                                                                                                                                              | [26] |
| Warmer sea water                     | North America    | Marine fisheries distribution                  | High human and social capital among the fisheries                                                | Changing pattern of fisheries' resources, infrastructure (because of warmer climate) and their distribution                          | Cooperative management across political boundaries for species likely to cross boundaries. Tradable permit/quota or dynamic allocation systems can make the allocation system more adaptable. Communities may pursue novel collective adaptation strategies | [27] |
| Extreme heat and dry                 | Sudan, Africa    | Adaptation in a pre-existing violent condition | Prevailing violent conflict, inadequate resource, low human capital, poverty                     | Drought affected vegetation, low crop productivity (partly due to war)                                                               | Crop diversification, adjustment of cropping season                                                                                                                                                                                                         | [28] |

|                                      |                           |                               |                                                                                                                              |                                                                                                                                                                            |                                                                                                                                                                                            |      |
|--------------------------------------|---------------------------|-------------------------------|------------------------------------------------------------------------------------------------------------------------------|----------------------------------------------------------------------------------------------------------------------------------------------------------------------------|--------------------------------------------------------------------------------------------------------------------------------------------------------------------------------------------|------|
| Reduced snow melting                 | European Alps             | Cross-border water sharing    | Willingness for cross-country collaboration                                                                                  | Reduced water in different distributaries in the basin                                                                                                                     | A group of scientists from all participating countries co-producing future adaptation plan                                                                                                 | [29] |
| Global Warming                       | European Alps             | Sustainable Tourism           | Local economy is heavily dependent of winter tourism                                                                         | Snow melting would reduce income                                                                                                                                           | Measuring future economic impact and have support service in place, diversifying economy                                                                                                   | [30] |
| Storm                                | Denmark, Europe           | Storm water Management        | Diversity in politics, knowledge, ideology, and cognition                                                                    | Diversity constrains collaboration, though facilitates innovation and adaptation                                                                                           | Bridging conflicting logics without constraining diversity could help achieve adaptation                                                                                                   | [31] |
| Storm Water Surge                    | Europe, Australia         | Cities (Urban Flood)          | Conflict over argument on economic efficiency and economic inefficiency                                                      | Urban flood, economic loss                                                                                                                                                 | Integrated approach to water management linking local use of rainwater (LAR) and climate adaptation, institutional coordination                                                            | [32] |
| Urban Flooding                       | Kolkata and Mumbai, India | Climate Resilient Cities      | Over extraction of ground water, rapid urbanisation in flood prone areas, illegal growth in environmentally sensitive areas. | Cities are facing more and more flood in recent years which is impacting poor urban neighbourhood. All climatic models suggest that impacts would be much higher in future | Climate action plan appear as cynical exercise, producing fantasy plans that may have minimal impact on development practices. Climate resilience appear to become a political opportunity | [33] |
| Sea level rise, precipitation change | Europe                    | Cities                        | Cross-sectional variables                                                                                                    | The study offers a better understanding of complex interfaces                                                                                                              | Cross-sectional model of six cities incorporate agriculture, biodiversity, flood, forest, urban and water                                                                                  | [34] |
| Climate change                       | Netherlands, Europe       | Conflict-sensitive adaptation | Strong conflict between priority and feasibility criteria in this indicator-based ranking of adaptation policy               | Changes in availability of water soil, and/or biodiversity, drought, erosion                                                                                               | More research needed on indirect land use and conflict implications of climate mitigation and adaptation measures                                                                          | [35] |

|                |                 |                                          |                                                                        |                                                                                                                    |                                                                                                                                                                                    |      |
|----------------|-----------------|------------------------------------------|------------------------------------------------------------------------|--------------------------------------------------------------------------------------------------------------------|------------------------------------------------------------------------------------------------------------------------------------------------------------------------------------|------|
| Climate change | Germany, Europe | Land use—Modelling                       | Open to cooperation and dynamic modelling                              | Scarcity of land, water quality, biodiversity, landscape fragmentation                                             | The model is flexible to different setting and adjustments and involve regional actors for their opinions                                                                          | [36] |
| Water Scarcity | North America   | Cities                                   | Behavioural and cultural dimensions of people                          | Complex and dynamic urban resources conflict                                                                       | Reducing outdoor water use require public education, and participation, consultation, conflict resolution, partnership, and citizen authority. Improving cross-sector coordination | [37] |
| Climate change | Global (South)  | Climate finance for developing countries | Over-dependence on natural resources                                   | Crop loss, new diseases, displacement, loss of livelihoods, food insecurity                                        | Accessing adaptation finance                                                                                                                                                       | [43] |
| Climate change | Global          | Cross border water sharing               | Different institutions and settings of a common river across border    | Territorial division of authority creates incentives for local innovation, learning and adaptation                 | Context sensitive flexible approaches to accommodate territorial design variables                                                                                                  | [44] |
| Climate change | Brazil          | Contested Knowledge                      | Diverse knowledge, research, planning, perception                      | Agricultural Loss                                                                                                  | Water managers need to have a thorough understanding of evapotranspiration process including knowledge on spatio-temporal rates.                                                   | [45] |
| Climate change | Africa          | Gender                                   | Gender role in society, poverty, poor institution, and social services | For having over dependence on nature, which are the hardest hit of climate change in Africa.                       | Conflict resolution approaches and climate adaptation strategies need to be gender-sensitive                                                                                       | [48] |
| Climate change | India           | Gendered agrobiodiversity                | Marginality and structural inequality in the social system             | Asymmetrical power relations within households, communities and structural inequalities make women more vulnerable | Gender sensitive adaptation policy development needs much clarity on cultural and socio-economic status quo of women and its links to crops, tasks and role of women.              | [49] |

|                        |                            |                                            |                                                                                                                                           |                                                                                                                                                                       |                                                                                                                                                                                                   |      |
|------------------------|----------------------------|--------------------------------------------|-------------------------------------------------------------------------------------------------------------------------------------------|-----------------------------------------------------------------------------------------------------------------------------------------------------------------------|---------------------------------------------------------------------------------------------------------------------------------------------------------------------------------------------------|------|
| Extreme heat and dry   | Kenya, Africa              | Conflict over Natural resource             | Unemployment, prevailing conflict over access to natural resources, scarcity of resources, absence of planning                            | Water scarcity, human wildlife conflict, farmer pastoral conflict                                                                                                     | Sensitivity assessment can help identify effective adaptive measures                                                                                                                              | [57] |
| Decreasing rainfall    | China                      | Environmental conservation                 | Pollution from the coal chemical industry                                                                                                 | Environmental pollutant damage, changes in rainfall in rainfall affect both the quality and quantity of water.                                                        | Economic efficiency performance and environmental pollutant damage can be balanced by equilibrium water resource and waste load allocation strategy.                                              | [58] |
| Climate change         | Tanzania                   | Community based Adaptation                 | Deforestation, overexploitation of ground water, destruction of water catchment areas, overfishing, uncoordinated construction of seawall | Nature-dependent livelihood income shrank, river channels dried up, soil fertility has reduced, livestock is hugely impacted, tourism is challenged for beach erosion | An integrated approach to adaptation can help communities retain flexibility by avoiding maladaptation                                                                                            | [59] |
| Typhoon and Earthquake | Taiwan, Asia               | Ecological footprint                       | Rapid economic growth has increased pressure on land development                                                                          | The race in economic growth will increase the ecological cost                                                                                                         | Adaptation needs to have a balance with ecological footprint and economic growth                                                                                                                  | [60] |
| Climate change         | Global (coffee production) | Shifting land use (coffee vs. forest)      | Constraints of land resources, potential forest loss, increased emission                                                                  | Climate change will have disparate effects for two species of coffees considered. Brazil might lose up to 84% of cultivation area.                                    | Expansion of coffee plantation in newer areas would have potential conflict with other land use, biodiversity loss and compromised ecosystem services                                             | [61] |
| Climate change         | Germany                    | Institutional Adaptation to climate change | Rigidity of bureaucratic public offices in cities                                                                                         | Integrative institutions constitute a sufficient but not necessary condition for "integrative adaptation"                                                             | State administrations may thus avoid additional climate-related burdens for citizens and conflicts among resource users by providing local administrations with means for additional coordination | [62] |

|                |                    |                    |                                                                |                                                                                                                                                                                                                                                                                                                                                                                           |                                                                                                                                                                     |      |
|----------------|--------------------|--------------------|----------------------------------------------------------------|-------------------------------------------------------------------------------------------------------------------------------------------------------------------------------------------------------------------------------------------------------------------------------------------------------------------------------------------------------------------------------------------|---------------------------------------------------------------------------------------------------------------------------------------------------------------------|------|
| Climate change | Sub-Saharan Africa | Nutrition Security | poor access to health services, poor household, undernutrition | Negative trend in environmental and natural resources. Calories availability in 2050 is likely to decline resulting in an additional 23 million undernourished children. Climate change related hunger, combined impact of decrease in agricultural production, flood, droughts, poor water infrastructure increase food prices, decrease livelihood sensitive to climate-related shocks. | Food security and nutrition needs to be prioritized in climate change interventions in Africa. Nutrition-focused adaptation and mitigation strategies are essential | [63] |
|----------------|--------------------|--------------------|----------------------------------------------------------------|-------------------------------------------------------------------------------------------------------------------------------------------------------------------------------------------------------------------------------------------------------------------------------------------------------------------------------------------------------------------------------------------|---------------------------------------------------------------------------------------------------------------------------------------------------------------------|------|
